# Supplementary material
Source: publisher figshare collection journal article supplement (https://acs.figshare.com/ndownloader/files/5759874)
Supplement: Supplementary file 1 [file 5759874]

# ja981016g.cif

# 1. SUBMISSION DETAILS

_publ_contact_author           # Name and address of author for correspondence
;
      Dr. Michael Bolte
      Institut f\"ur Organische Chemie
      J.-W.-Goethe-Universit\"at
      Marie-Curie-Str. 11
      60439 Frankfurt/Main
      Germany
;
_publ_contact_author_phone        '49 69 798 29136'
_publ_contact_author_fax          '49 69 798 29128'
_publ_contact_author_email        bolte@chemie.uni-frankfurt.de
   
_publ_requested_journal           'J. Amer. Chem. Soc'
_publ_requested_coeditor_name     ' '

_publ_contact_letter
;
     This submission contains three cif-files for the manuscript 
     JA981016G-79;

     Title: Experimental Investigations and Ab Initio Studies on  
     Hexacoordinated Complexes of Dichlorosilane.

     Authors: Karl Hensen, Thorsten Stumpf, Michael Bolte, 
     Christian N=E4ther, Holger Fleischer

;

#==============================================================================
 
data_bock327 
 
_audit_creation_method            SHELXL 
_chemical_name_systematic 
; 
 ? 
; 
_chemical_name_common             ? 
_chemical_formula_moiety          ? 
_chemical_formula_structural      ? 
_chemical_formula_analytical      ? 
_chemical_formula_sum             'C24 H26 Cl14 N4 Si' 
_chemical_formula_weight          894.88 
_chemical_melting_point           ? 
_chemical_compound_source         ? 
 
loop_ 
 _atom_type_symbol 
 _atom_type_description 
 _atom_type_scat_dispersion_real 
 _atom_type_scat_dispersion_imag 
 _atom_type_scat_source 
 'C'  'C'   0.0033   0.0016 
 'International Tables Vol C Tables 4.2.6.8 and 6.1.1.4' 
 'H'  'H'   0.0000   0.0000 
 'International Tables Vol C Tables 4.2.6.8 and 6.1.1.4' 
 'N'  'N'   0.0061   0.0033 
 'International Tables Vol C Tables 4.2.6.8 and 6.1.1.4' 
 'Si'  'Si'   0.0817   0.0704 
 'International Tables Vol C Tables 4.2.6.8 and 6.1.1.4' 
 'Cl'  'Cl'   0.1484   0.1585 
 'International Tables Vol C Tables 4.2.6.8 and 6.1.1.4' 
 
_symmetry_cell_setting            ? 
_symmetry_space_group_name_H-M    ? 
 
loop_ 
 _symmetry_equiv_pos_as_xyz 
 'x, y, z' 
 '-x, y, -z' 
 'x+1/2, y+1/2, z' 
 '-x+1/2, y+1/2, -z' 
 '-x, -y, -z' 
 'x, -y, z' 
 '-x+1/2, -y+1/2, -z' 
 'x+1/2, -y+1/2, z' 
 
_cell_length_a                    10.5080(10) 
_cell_length_b                    14.8330(10) 
_cell_length_c                    12.5080(10) 
_cell_angle_alpha                 90.00 
_cell_angle_beta                  99.767(5) 
_cell_angle_gamma                 90.00 
_cell_volume                      1921.3(3) 
_cell_formula_units_Z             2 
_cell_measurement_temperature     130(2) 
_cell_measurement_reflns_used     ? 
_cell_measurement_theta_min       ? 
_cell_measurement_theta_max       ? 
 
_exptl_crystal_description        ? 
_exptl_crystal_colour             ? 
_exptl_crystal_size_max           ? 
_exptl_crystal_size_mid           ? 
_exptl_crystal_size_min           ? 
_exptl_crystal_density_meas       ? 
_exptl_crystal_density_diffrn     1.547 
_exptl_crystal_density_method     ? 
_exptl_crystal_F_000              900 
_exptl_absorpt_coefficient_mu     1.059 
_exptl_absorpt_correction_type    ? 
_exptl_absorpt_correction_T_min   ? 
_exptl_absorpt_correction_T_max   ? 
 
_exptl_special_details 
; 
 ? 
; 
 
_diffrn_ambient_temperature       130(2) 
_diffrn_radiation_wavelength      0.71073 
_diffrn_radiation_type            MoK\a 
_diffrn_radiation_source          'fine-focus sealed tube' 
_diffrn_radiation_monochromator   graphite 
_diffrn_measurement_device        ? 
_diffrn_measurement_method        ? 
_diffrn_standards_number          ? 
_diffrn_standards_interval_count  ? 
_diffrn_standards_interval_time   ? 
_diffrn_standards_decay_%         ? 
_diffrn_reflns_number             2470 
_diffrn_reflns_av_R_equivalents   0.0455 
_diffrn_reflns_av_sigmaI/netI     0.0419 
_diffrn_reflns_limit_h_min        0 
_diffrn_reflns_limit_h_max        13 
_diffrn_reflns_limit_k_min        -3 
_diffrn_reflns_limit_k_max        18 
_diffrn_reflns_limit_l_min        -15 
_diffrn_reflns_limit_l_max        15 
_diffrn_reflns_theta_min          2.40 
_diffrn_reflns_theta_max          26.49 
_reflns_number_total              2065 
_reflns_number_observed           1530 
_reflns_observed_criterion        >2sigma(I) 
 
_computing_data_collection        ? 
_computing_cell_refinement        ? 
_computing_data_reduction         ? 
_computing_structure_solution     'SHELXS-86 (Sheldrick, 1990)' 
_computing_structure_refinement   'SHELXL-93 (Sheldrick, 1993)' 
_computing_molecular_graphics     ? 
_computing_publication_material   ? 
 
_refine_special_details 
; 
 Refinement on F^2^ for ALL reflections except for 0 with very negative F^2^ 
 or flagged by the user for potential systematic errors.  Weighted R-factors 
 wR and all goodnesses of fit S are based on F^2^, conventional R-factors R 
 are based on F, with F set to zero for negative F^2^. The observed criterion 
 of F^2^ > 2sigma(F^2^) is used only for calculating _R_factor_obs etc. and is 
 not relevant to the choice of reflections for refinement.  R-factors based 
 on F^2^ are statistically about twice as large as those based on F, and R- 
 factors based on ALL data will be even larger. 
; 
 
_refine_ls_structure_factor_coef  Fsqd  
_refine_ls_matrix_type            full 
_refine_ls_weighting_scheme 
 'calc w=1/[\s^2^(Fo^2^)+(0.0487P)^2^+10.9459P] where P=(Fo^2^+2Fc^2^)/3' 
_atom_sites_solution_primary      direct 
_atom_sites_solution_secondary    difmap 
_atom_sites_solution_hydrogens    geom 
_refine_ls_hydrogen_treatment     ? 
_refine_ls_extinction_method      none 
_refine_ls_extinction_coef        ? 
_refine_ls_number_reflns          2065 
_refine_ls_number_parameters      118 
_refine_ls_number_restraints      0 
_refine_ls_R_factor_all           0.0897 
_refine_ls_R_factor_obs           0.0641 
_refine_ls_wR_factor_all          0.1609 
_refine_ls_wR_factor_obs          0.1446 
_refine_ls_goodness_of_fit_all    1.061 
_refine_ls_goodness_of_fit_obs    1.117 
_refine_ls_restrained_S_all       1.061 
_refine_ls_restrained_S_obs       1.117 
_refine_ls_shift/esd_max          0.000 
_refine_ls_shift/esd_mean         0.000 
 
loop_ 
 _atom_site_label 
 _atom_site_type_symbol 
 _atom_site_fract_x 
 _atom_site_fract_y 
 _atom_site_fract_z 
 _atom_site_U_iso_or_equiv 
 _atom_site_thermal_displace_type 
 _atom_site_occupancy 
 _atom_site_calc_flag 
 _atom_site_refinement_flags 
 _atom_site_disorder_group 
Si1 Si 0.5000 0.5000 0.5000 0.0245(4) Uani 1 d S . 
N1 N 0.3728(4) 0.5000 0.3657(4) 0.0261(9) Uani 1 d S . 
C1 C 0.2441(5) 0.5000 0.3692(4) 0.0290(11) Uani 1 d S . 
H1 H 0.2170(5) 0.5000 0.4380(4) 0.035 Uiso 1 calc SR . 
C2 C 0.1522(6) 0.5000 0.2777(5) 0.0360(13) Uani 1 d S . 
H2 H 0.0630(6) 0.5000 0.2828(5) 0.043 Uiso 1 calc SR . 
C3 C 0.1916(6) 0.5000 0.1773(5) 0.0393(14) Uani 1 d S . 
H3 H 0.1298(6) 0.5000 0.1123(5) 0.047 Uiso 1 calc SR . 
C4 C 0.3221(6) 0.5000 0.1733(5) 0.0418(14) Uani 1 d S . 
H4 H 0.3511(6) 0.5000 0.1053(5) 0.050 Uiso 1 calc SR . 
C5 C 0.4102(6) 0.5000 0.2684(5) 0.0336(12) Uani 1 d S . 
H5 H 0.4998(6) 0.5000 0.2649(5) 0.040 Uiso 1 calc SR . 
N2 N 0.5000 0.6328(3) 0.5000 0.0319(10) Uani 1 d S . 
C6 C 0.4201(5) 0.6783(3) 0.5537(4) 0.0467(11) Uani 1 d . . 
H6 H 0.3631(5) 0.6461(3) 0.5912(4) 0.056 Uiso 1 calc R . 
C7 C 0.4199(6) 0.7710(3) 0.5552(5) 0.063(2) Uani 1 d . . 
H7 H 0.3639(6) 0.8023(3) 0.5946(5) 0.076 Uiso 1 calc R . 
C8 C 0.5000 0.8185(5) 0.5000 0.070(3) Uani 1 d S . 
H8 H 0.5000 0.8825(5) 0.5000 0.083 Uiso 1 calc SR . 
Cl1 Cl 0.16359(14) 0.5000 0.63944(11) 0.0329(3) Uani 1 d S . 
C9 C 0.2212(4) 0.3410(3) 0.8294(4) 0.0431(10) Uani 1 d . . 
Cl2 Cl 0.3797(2) 0.36107(15) 0.8887(2) 0.1011(7) Uani 1 d . . 
Cl3 Cl 0.1196(2) 0.35664(15) 0.9239(2) 0.0993(7) Uani 1 d . . 
Cl4 Cl 0.2049(2) 0.23201(11) 0.7782(2) 0.1040(7) Uani 1 d . . 
H9 H 0.1934(44) 0.3832(34) 0.7674(38) 0.049(13) Uiso 1 d . . 
H1SI H 0.4050(46) 0.5000 0.5575(38) 0.014(12) Uiso 1 d S . 
 
loop_ 
 _atom_site_aniso_label 
 _atom_site_aniso_U_11 
 _atom_site_aniso_U_22 
 _atom_site_aniso_U_33 
 _atom_site_aniso_U_23 
 _atom_site_aniso_U_13 
 _atom_site_aniso_U_12 
Si1 0.0217(10) 0.0201(9) 0.0323(11) 0.000 0.0063(8) 0.000 
N1 0.028(2) 0.018(2) 0.032(2) 0.000 0.007(2) 0.000 
C1 0.030(3) 0.024(3) 0.034(3) 0.000 0.010(2) 0.000 
C2 0.029(3) 0.037(3) 0.041(3) 0.000 0.004(2) 0.000 
C3 0.045(3) 0.035(3) 0.035(3) 0.000 -0.003(3) 0.000 
C4 0.049(4) 0.041(3) 0.036(3) 0.000 0.010(3) 0.000 
C5 0.037(3) 0.028(3) 0.037(3) 0.000 0.011(2) 0.000 
N2 0.031(2) 0.021(2) 0.041(3) 0.000 -0.002(2) 0.000 
C6 0.046(3) 0.033(2) 0.059(3) -0.008(2) 0.003(2) 0.010(2) 
C7 0.067(3) 0.031(2) 0.084(4) -0.018(3) -0.008(3) 0.016(2) 
C8 0.069(5) 0.021(3) 0.100(6) 0.000 -0.040(5) 0.000 
Cl1 0.0395(7) 0.0322(7) 0.0282(6) 0.000 0.0089(5) 0.000 
C9 0.047(3) 0.039(2) 0.043(2) 0.007(2) 0.008(2) 0.003(2) 
Cl2 0.0615(9) 0.114(2) 0.1167(15) 0.0464(12) -0.0157(9) -0.0252(10) 
Cl3 0.1121(14) 0.1015(14) 0.0998(13) 0.0211(11) 0.0625(11) 0.0265(11) 
Cl4 0.169(2) 0.0481(9) 0.0844(12) -0.0142(8) -0.0072(12) 0.0074(11) 
 
_geom_special_details 
; 
 All esds (except the esd in the dihedral angle between two l.s. planes) 
 are estimated using the full covariance matrix.  The cell esds are taken 
 into account individually in the estimation of esds in distances, angles 
 and torsion angles; correlations between esds in cell parameters are only 
 used when they are defined by crystal symmetry.  An approximate (isotropic) 
 treatment of cell esds is used for estimating esds involving l.s. planes. 
; 
 
loop_ 
 _geom_bond_atom_site_label_1 
 _geom_bond_atom_site_label_2 
 _geom_bond_distance 
 _geom_bond_site_symmetry_2 
 _geom_bond_publ_flag 
Si1 N1 1.962(4) 5_666 ? 
Si1 N1 1.962(4) . ? 
Si1 N2 1.970(4) . ? 
Si1 N2 1.970(4) 5_666 ? 
N1 C5 1.341(7) . ? 
N1 C1 1.361(7) . ? 
C1 C2 1.366(8) . ? 
C2 C3 1.388(8) . ? 
C3 C4 1.381(9) . ? 
C4 C5 1.377(8) . ? 
N2 C6 1.343(5) 2_656 ? 
N2 C6 1.343(5) . ? 
C6 C7 1.375(6) . ? 
C7 C8 1.371(7) . ? 
C8 C7 1.371(7) 2_656 ? 
C9 Cl2 1.730(5) . ? 
C9 Cl4 1.736(5) . ? 
C9 Cl3 1.738(5) . ? 
 
loop_ 
 _geom_angle_atom_site_label_1 
 _geom_angle_atom_site_label_2 
 _geom_angle_atom_site_label_3 
 _geom_angle 
 _geom_angle_site_symmetry_1 
 _geom_angle_site_symmetry_3 
 _geom_angle_publ_flag 
N1 Si1 N1 180.0 5_666 . ? 
N1 Si1 N2 90.0 5_666 . ? 
N1 Si1 N2 90.0 . . ? 
N1 Si1 N2 90.0 5_666 5_666 ? 
N1 Si1 N2 90.0 . 5_666 ? 
N2 Si1 N2 180.0 . 5_666 ? 
C5 N1 C1 118.4(5) . . ? 
C5 N1 Si1 121.0(4) . . ? 
C1 N1 Si1 120.6(4) . . ? 
N1 C1 C2 122.5(5) . . ? 
C1 C2 C3 118.8(5) . . ? 
C4 C3 C2 118.9(6) . . ? 
C5 C4 C3 119.6(6) . . ? 
N1 C5 C4 121.8(5) . . ? 
C6 N2 C6 119.7(5) 2_656 . ? 
C6 N2 Si1 120.2(3) 2_656 . ? 
C6 N2 Si1 120.2(3) . . ? 
N2 C6 C7 120.8(5) . . ? 
C8 C7 C6 120.3(6) . . ? 
C7 C8 C7 118.1(6) . 2_656 ? 
Cl2 C9 Cl4 110.2(3) . . ? 
Cl2 C9 Cl3 110.1(3) . . ? 
Cl4 C9 Cl3 110.0(3) . . ? 
 
loop_ 
 _geom_torsion_atom_site_label_1 
 _geom_torsion_atom_site_label_2 
 _geom_torsion_atom_site_label_3 
 _geom_torsion_atom_site_label_4 
 _geom_torsion 
 _geom_torsion_site_symmetry_1 
 _geom_torsion_site_symmetry_2 
 _geom_torsion_site_symmetry_3 
 _geom_torsion_site_symmetry_4 
 _geom_torsion_publ_flag 
 N1 Si1 N1 C5 -73.5(1000) 5_666 . . . ? 
 N2 Si1 N1 C5 90.0 . . . . ? 
 N2 Si1 N1 C5 -90.0 5_666 . . . ? 
 N1 Si1 N1 C1 106.5(1000) 5_666 . . . ? 
 N2 Si1 N1 C1 -90.0 . . . . ? 
 N2 Si1 N1 C1 90.0 5_666 . . . ? 
 C5 N1 C1 C2 0.000(1) . . . . ? 
 Si1 N1 C1 C2 180.0 . . . . ? 
 N1 C1 C2 C3 0.000(1) . . . . ? 
 C1 C2 C3 C4 0.0 . . . . ? 
 C2 C3 C4 C5 0.0 . . . . ? 
 C1 N1 C5 C4 0.0 . . . . ? 
 Si1 N1 C5 C4 180.0 . . . . ? 
 C3 C4 C5 N1 0.0 . . . . ? 
 N1 Si1 N2 C6 92.4(3) 5_666 . . 2_656 ? 
 N1 Si1 N2 C6 -87.6(3) . . . 2_656 ? 
 N2 Si1 N2 C6 0.0(1000) 5_666 . . 2_656 ? 
 N1 Si1 N2 C6 -87.6(3) 5_666 . . . ? 
 N1 Si1 N2 C6 92.4(3) . . . . ? 
 N2 Si1 N2 C6 0.0(1000) 5_666 . . . ? 
 C6 N2 C6 C7 -0.6(4) 2_656 . . . ? 
 Si1 N2 C6 C7 179.4(4) . . . . ? 
 N2 C6 C7 C8 1.1(7) . . . . ? 
 C6 C7 C8 C7 -0.5(4) . . . 2_656 ? 
 
_refine_diff_density_max    0.841 
_refine_diff_density_min   -0.697 
_refine_diff_density_rms    0.082 

 
data_he10 
  
_audit_creation_method            SHELXL 
_chemical_name_systematic 
; 
 ? 
; 
_chemical_name_common             ? 
_chemical_formula_moiety          ? 
_chemical_formula_structural      ? 
_chemical_formula_analytical      ? 
_chemical_formula_sum 
 'C10 H12 Cl2 N2 Si' 
_chemical_formula_weight          259.21 
_chemical_melting_point           ? 
_chemical_compound_source         ? 
  
loop_ 
 _atom_type_symbol 
 _atom_type_description 
 _atom_type_scat_dispersion_real 
 _atom_type_scat_dispersion_imag 
 _atom_type_scat_source 
 'C'  'C'   0.0033   0.0016 
 'International Tables Vol C Tables 4.2.6.8 and 6.1.1.4' 
 'H'  'H'   0.0000   0.0000 
 'International Tables Vol C Tables 4.2.6.8 and 6.1.1.4' 
 'N'  'N'   0.0061   0.0033 
 'International Tables Vol C Tables 4.2.6.8 and 6.1.1.4' 
 'Si'  'Si'   0.0817   0.0704 
 'International Tables Vol C Tables 4.2.6.8 and 6.1.1.4' 
 'Cl'  'Cl'   0.1484   0.1585 
 'International Tables Vol C Tables 4.2.6.8 and 6.1.1.4' 
  
_symmetry_cell_setting            Monoclinic 
_symmetry_space_group_name_H-M    C2/c 
  
loop_ 
 _symmetry_equiv_pos_as_xyz 
 'x, y, z' 
 '-x, y, -z+1/2' 
 'x+1/2, y+1/2, z' 
 '-x+1/2, y+1/2, -z+1/2' 
 '-x, -y, -z' 
 'x, -y, z-1/2' 
 '-x+1/2, -y+1/2, -z' 
 'x+1/2, -y+1/2, z-1/2' 
  
_cell_length_a                    15.4608(1) 
_cell_length_b                    6.1660(1) 
_cell_length_c                    14.3313(2) 
_cell_angle_alpha                 90 
_cell_angle_beta                  118.576(1) 
_cell_angle_gamma                 90 
_cell_volume                      1199.79(3) 
_cell_formula_units_Z             4 
_cell_measurement_temperature     153 
_cell_measurement_reflns_used     4567 
_cell_measurement_theta_min       1.00 
_cell_measurement_theta_max       25.00 
  
_exptl_crystal_description        plate 
_exptl_crystal_colour             'colourless transparent' 
_exptl_crystal_size_max           0.30 
_exptl_crystal_size_mid           0.30 
_exptl_crystal_size_min           0.08 
_exptl_crystal_density_meas       N/A 
_exptl_crystal_density_diffrn     1.435 
_exptl_crystal_density_method     N/A 
_exptl_crystal_F_000              536 
_exptl_absorpt_coefficient_mu     0.609 
_exptl_absorpt_correction_type    'Empirical using SADABS (G. Sheldrick)' 
_exptl_absorpt_correction_T_min   0.7140 
_exptl_absorpt_correction_T_max   1.0000 
  
_exptl_special_details 
; 
 ? 
; 
  
_diffrn_ambient_temperature       153 
_diffrn_radiation_wavelength      0.71073 
_diffrn_radiation_type            MoK\a 
_diffrn_radiation_source          'fine-focus sealed tube' 
_diffrn_radiation_monochromator   'highly oriented graphite crystal' 
_diffrn_measurement_device        'Siemens CCD three circle diffractometer' 
_diffrn_measurement_method        \w 
_diffrn_standards_number          123 
_diffrn_standards_interval_count  ? 
_diffrn_standards_interval_time   600 
_diffrn_standards_decay_%         0.0 
_diffrn_reflns_number             7430 
_diffrn_reflns_av_R_equivalents   0.0361 
_diffrn_reflns_av_sigmaI/netI     0.0259 
_diffrn_reflns_limit_h_min        -19 
_diffrn_reflns_limit_h_max        17 
_diffrn_reflns_limit_k_min        -7 
_diffrn_reflns_limit_k_max        7 
_diffrn_reflns_limit_l_min        -17 
_diffrn_reflns_limit_l_max        17 
_diffrn_reflns_theta_min          3.00 
_diffrn_reflns_theta_max          26.33 
_reflns_number_total              1203 
_reflns_number_observed           1025 
_reflns_observed_criterion        >2sigma(I) 
  
_computing_data_collection        'Siemens SMART' 
_computing_cell_refinement        'Siemens SMART' 
_computing_data_reduction         'Siemens SAINT' 
_computing_structure_solution     'SHELXS-96 (Sheldrick, 1990)' 
_computing_structure_refinement   'SHELXL-96 (Sheldrick, 1996)' 
_computing_molecular_graphics     'XP (Siemens XTL-Plus)' 
_computing_publication_material   ? 
  
_refine_special_details 
; 
 Refinement of F^2^ against ALL reflections.  Weighted R-factors wR and all 
 goodnesses of fit S are based on F^2^, conventional R-factors R 
 are based on F, with F set to zero for negative F^2^. The observed criterion 
 of F^2^ > 2sigma(F^2^) is used only for calculating _R_factor_obs etc. and is 
 not relevant to the choice of reflections for refinement.  R-factors based 
 on F^2^ are statistically about twice as large as those based on F, and R- 
 factors based on ALL data will be even larger. 
; 
  
_refine_ls_structure_factor_coef  Fsqd 
_refine_ls_matrix_type            full 
_refine_ls_weighting_scheme 
 'calc w=1/[\s^2^(Fo^2^)+(0.0310P)^2^+0.9756P] where P=(Fo^2^+2Fc^2^)/3' 
_atom_sites_solution_primary      direct 
_atom_sites_solution_secondary    difmap 
_atom_sites_solution_hydrogens    geom 
_refine_ls_hydrogen_treatment     'see experimental section' 
_refine_ls_extinction_method      none 
_refine_ls_extinction_coef        ? 
_refine_ls_number_reflns          1203 
_refine_ls_number_parameters      74 
_refine_ls_number_restraints      0 
_refine_ls_R_factor_all           0.0401 
_refine_ls_R_factor_obs           0.0289 
_refine_ls_wR_factor_all          0.0696 
_refine_ls_wR_factor_obs          0.0656 
_refine_ls_goodness_of_fit_all    1.116 
_refine_ls_goodness_of_fit_obs    1.145 
_refine_ls_restrained_S_all       1.116 
_refine_ls_restrained_S_obs       1.145 
_refine_ls_shift/esd_max          0.000 
_refine_ls_shift/esd_mean         0.000 
  
loop_ 
 _atom_site_label 
 _atom_site_type_symbol 
 _atom_site_fract_x 
 _atom_site_fract_y 
 _atom_site_fract_z 
 _atom_site_U_iso_or_equiv 
 _atom_site_thermal_displace_type 
 _atom_site_occupancy 
 _atom_site_calc_flag 
 _atom_site_refinement_flags 
 _atom_site_disorder_group 
Si1 Si 0.2500 0.7500 0.5000 0.01942(18) Uani 1 d S . 
H1 H 0.2830(14) 0.920(3) 0.5720(14) 0.021(5) Uiso 1 d . . 
Cl1 Cl 0.38801(3) 0.55497(7) 0.60803(3) 0.02574(15) Uani 1 d . . 
N1 N 0.18091(10) 0.6224(2) 0.57192(11) 0.0198(3) Uani 1 d . . 
C2 C 0.16852(14) 0.7369(3) 0.64463(14) 0.0246(4) Uani 1 d . . 
H2 H 0.1944 0.8799 0.6613 0.030 Uiso 1 calc R . 
C3 C 0.11954(14) 0.6538(3) 0.69565(15) 0.0298(4) Uani 1 d . . 
H3 H 0.1117 0.7379 0.7467 0.036 Uiso 1 calc R . 
C4 C 0.08182(14) 0.4444(3) 0.67090(16) 0.0306(4) Uani 1 d . . 
H4 H 0.0482 0.3827 0.7052 0.037 Uiso 1 calc R . 
C5 C 0.09392(14) 0.3275(3) 0.59582(15) 0.0274(4) Uani 1 d . . 
H5 H 0.0680 0.1849 0.5772 0.033 Uiso 1 calc R . 
C6 C 0.14416(13) 0.4202(3) 0.54800(14) 0.0234(4) Uani 1 d . . 
H6 H 0.1530 0.3389 0.4969 0.028 Uiso 1 calc R . 
  
loop_ 
 _atom_site_aniso_label 
 _atom_site_aniso_U_11 
 _atom_site_aniso_U_22 
 _atom_site_aniso_U_33 
 _atom_site_aniso_U_23 
 _atom_site_aniso_U_13 
 _atom_site_aniso_U_12 
Si1 0.0224(4) 0.0173(3) 0.0215(4) -0.0023(2) 0.0128(3) -0.0039(3) 
Cl1 0.0246(2) 0.0241(2) 0.0290(3) 0.00256(17) 0.0132(2) -0.00004(18) 
N1 0.0199(7) 0.0195(7) 0.0211(8) 0.0006(6) 0.0108(6) -0.0007(6) 
C2 0.0257(9) 0.0246(9) 0.0248(10) -0.0031(7) 0.0130(8) -0.0016(7) 
C3 0.0300(10) 0.0382(10) 0.0251(10) -0.0014(8) 0.0163(9) 0.0015(9) 
C4 0.0259(10) 0.0395(11) 0.0315(11) 0.0088(9) 0.0178(9) -0.0009(9) 
C5 0.0253(10) 0.0226(9) 0.0340(11) 0.0055(8) 0.0139(9) -0.0014(8) 
C6 0.0244(9) 0.0197(8) 0.0277(10) -0.0016(7) 0.0138(8) -0.0022(7) 
  
_geom_special_details 
; 
 All esds (except the esd in the dihedral angle between two l.s. planes) 
 are estimated using the full covariance matrix.  The cell esds are taken 
 into account individually in the estimation of esds in distances, angles 
 and torsion angles; correlations between esds in cell parameters are only 
 used when they are defined by crystal symmetry.  An approximate (isotropic) 
 treatment of cell esds is used for estimating esds involving l.s. planes. 
; 
  
loop_ 
 _geom_bond_atom_site_label_1 
 _geom_bond_atom_site_label_2 
 _geom_bond_distance 
 _geom_bond_site_symmetry_2 
 _geom_bond_publ_flag 
Si1 N1 1.9686(14) . ? 
Si1 N1 1.9686(14) 7_566 ? 
Si1 Cl1 2.2881(4) 7_566 ? 
Si1 Cl1 2.2881(4) . ? 
N1 C6 1.345(2) . ? 
N1 C2 1.346(2) . ? 
C2 C3 1.379(3) . ? 
C3 C4 1.391(3) . ? 
C4 C5 1.380(3) . ? 
C5 C6 1.382(3) . ? 
  
loop_ 
 _geom_angle_atom_site_label_1 
 _geom_angle_atom_site_label_2 
 _geom_angle_atom_site_label_3 
 _geom_angle 
 _geom_angle_site_symmetry_1 
 _geom_angle_site_symmetry_3 
 _geom_angle_publ_flag 
N1 Si1 N1 180.0 . 7_566 ? 
N1 Si1 Cl1 90.02(4) . 7_566 ? 
N1 Si1 Cl1 89.98(4) 7_566 7_566 ? 
N1 Si1 Cl1 89.98(4) . . ? 
N1 Si1 Cl1 90.02(4) 7_566 . ? 
Cl1 Si1 Cl1 180.0 7_566 . ? 
C6 N1 C2 118.97(15) . . ? 
C6 N1 Si1 120.39(12) . . ? 
C2 N1 Si1 120.63(12) . . ? 
N1 C2 C3 122.23(17) . . ? 
C2 C3 C4 118.64(18) . . ? 
C5 C4 C3 119.14(18) . . ? 
C4 C5 C6 119.25(17) . . ? 
N1 C6 C5 121.76(16) . . ? 
  
loop_ 
 _geom_torsion_atom_site_label_1 
 _geom_torsion_atom_site_label_2 
 _geom_torsion_atom_site_label_3 
 _geom_torsion_atom_site_label_4 
 _geom_torsion 
 _geom_torsion_site_symmetry_1 
 _geom_torsion_site_symmetry_2 
 _geom_torsion_site_symmetry_3 
 _geom_torsion_site_symmetry_4 
 _geom_torsion_publ_flag 
 N1 Si1 N1 C6 -18(7) 7_566 . . . ? 
 Cl1 Si1 N1 C6 101.44(12) 7_566 . . . ? 
 Cl1 Si1 N1 C6 -78.56(12) . . . . ? 
 N1 Si1 N1 C2 163(7) 7_566 . . . ? 
 Cl1 Si1 N1 C2 -77.65(13) 7_566 . . . ? 
 Cl1 Si1 N1 C2 102.35(13) . . . . ? 
 C6 N1 C2 C3 0.1(3) . . . . ? 
 Si1 N1 C2 C3 179.23(14) . . . . ? 
 N1 C2 C3 C4 0.0(3) . . . . ? 
 C2 C3 C4 C5 -0.5(3) . . . . ? 
 C3 C4 C5 C6 0.8(3) . . . . ? 
 C2 N1 C6 C5 0.2(3) . . . . ? 
 Si1 N1 C6 C5 -178.93(13) . . . . ? 
 C4 C5 C6 N1 -0.6(3) . . . . ? 
  
_refine_diff_density_max    0.213 
_refine_diff_density_min   -0.326 
_refine_diff_density_rms    0.052 

 
data_he17 
  
_audit_creation_method            SHELXL-97 
_chemical_name_systematic 
; 
 ? 
; 
_chemical_name_common             ? 
_chemical_formula_moiety          ? 
_chemical_formula_sum 
 'C12 H16 Cl2 N2 Si' 
_chemical_formula_weight          287.26 
  
loop_ 
 _atom_type_symbol 
 _atom_type_description 
 _atom_type_scat_dispersion_real 
 _atom_type_scat_dispersion_imag 
 _atom_type_scat_source 
 'C'  'C'   0.0033   0.0016 
 'International Tables Vol C Tables 4.2.6.8 and 6.1.1.4' 
 'H'  'H'   0.0000   0.0000 
 'International Tables Vol C Tables 4.2.6.8 and 6.1.1.4' 
 'N'  'N'   0.0061   0.0033 
 'International Tables Vol C Tables 4.2.6.8 and 6.1.1.4' 
 'Si'  'Si'   0.0817   0.0704 
 'International Tables Vol C Tables 4.2.6.8 and 6.1.1.4' 
 'Cl'  'Cl'   0.1484   0.1585 
 'International Tables Vol C Tables 4.2.6.8 and 6.1.1.4' 
  
_symmetry_cell_setting            Triclinic 
_symmetry_space_group_name_H-M    P-1 
  
loop_ 
 _symmetry_equiv_pos_as_xyz 
 'x, y, z' 
 '-x, -y, -z' 
  
_cell_length_a                    6.0174(2) 
_cell_length_b                    7.5422(3) 
_cell_length_c                    8.5744(3) 
_cell_angle_alpha                 65.954(1) 
_cell_angle_beta                  76.746(1) 
_cell_angle_gamma                 77.881(1) 
_cell_volume                      342.92(2) 
_cell_formula_units_Z             1 
_cell_measurement_temperature     173 
_cell_measurement_reflns_used     3860 
_cell_measurement_theta_min       1.00 
_cell_measurement_theta_max       25.00 
  
_exptl_crystal_description        plate 
_exptl_crystal_colour             colourless 
_exptl_crystal_size_max           0.50 
_exptl_crystal_size_mid           0.40 
_exptl_crystal_size_min           0.20 
_exptl_crystal_density_meas       N/A 
_exptl_crystal_density_diffrn     1.391 
_exptl_crystal_density_method     'not measured' 
_exptl_crystal_F_000              150 
_exptl_absorpt_coefficient_mu     0.540 
_exptl_absorpt_correction_type    'Empirical, SADABS (Sheldrick,1996)' 
_exptl_absorpt_correction_T_min   0.7739 
_exptl_absorpt_correction_T_max   0.8996 
  
_exptl_special_details 
; 
 ? 
; 
  
_diffrn_ambient_temperature       173 
_diffrn_radiation_wavelength      0.71073 
_diffrn_radiation_type            MoK\a 
_diffrn_radiation_source          'fine-focus sealed tube' 
_diffrn_radiation_monochromator   'highly oriented graphite crystal' 
_diffrn_measurement_device_type   ? 
_diffrn_measurement_device        'Siemens CCD three circle diffractometer' 
_diffrn_measurement_method        \w 
_diffrn_detector_area_resol_mean  ? 
_diffrn_standards_number          83 
_diffrn_standards_interval_count  ? 
_diffrn_standards_interval_time   1200 
_diffrn_standards_decay_%         0.0 
_diffrn_reflns_number             5012 
_diffrn_reflns_av_R_equivalents   0.0209 
_diffrn_reflns_av_sigmaI/netI     0.0202 
_diffrn_reflns_limit_h_min        -7 
_diffrn_reflns_limit_h_max        7 
_diffrn_reflns_limit_k_min        -9 
_diffrn_reflns_limit_k_max        8 
_diffrn_reflns_limit_l_min        -10 
_diffrn_reflns_limit_l_max        10 
_diffrn_reflns_theta_min          2.64 
_diffrn_reflns_theta_max          26.37 
_reflns_number_total              1370 
_reflns_number_gt                 1191 
_reflns_threshold_expression      >2sigma(I) 
  
_computing_data_collection        'Siemens SMART' 
_computing_cell_refinement        'Siemens SMART' 
_computing_data_reduction         'Siemens SAINT' 
_computing_structure_solution     'SHELXS-97 (Sheldrick, 1990)' 
_computing_structure_refinement   'SHELXL-97 (Sheldrick, 1997)' 
_computing_molecular_graphics     'XP (Siemens XTL-Plus)' 
_computing_publication_material   ? 
  
_refine_special_details 
; 
 Refinement of F^2^ against ALL reflections.  The weighted R-factor wR and 
 goodness of fit S are based on F^2^, conventional R-factors R are based 
 on F, with F set to zero for negative F^2^. The threshold expression of 
 F^2^ > 2sigma(F^2^) is used only for calculating R-factors(gt) etc. and is 
 not relevant to the choice of reflections for refinement.  R-factors based 
 on F^2^ are statistically about twice as large as those based on F, and R- 
 factors based on ALL data will be even larger. 
; 
  
_refine_ls_structure_factor_coef  Fsqd 
_refine_ls_matrix_type            full 
_refine_ls_weighting_scheme 
 'calc w=1/[\s^2^(Fo^2^)+(0.0456P)^2^+0.1035P] where P=(Fo^2^+2Fc^2^)/3' 
_atom_sites_solution_primary      direct 
_atom_sites_solution_secondary    difmap 
_atom_sites_solution_hydrogens    geom 
_refine_ls_hydrogen_treatment     mixed 
_refine_ls_extinction_method      none 
_refine_ls_extinction_coef        ? 
_refine_ls_number_reflns          1370 
_refine_ls_number_parameters      84 
_refine_ls_number_restraints      0 
_refine_ls_R_factor_all           0.0334 
_refine_ls_R_factor_gt            0.0276 
_refine_ls_r_factor_obs           0.0276 
_refine_ls_wR_factor_ref          0.0772 
_refine_ls_wr_factor_all          0.0772 
_refine_ls_wR_factor_gt           0.0745 
_refine_ls_wr_factor_obs          0.0745 
_refine_ls_wr_factor_gt           0.0745 
_refine_ls_goodness_of_fit_ref    1.056 
_refine_ls_goodness_of_fit_all    1.056 
_refine_ls_restrained_S_all       1.056 
_refine_ls_shift/su_max           0.006 
_refine_ls_shift/su_mean          0.000 
  
loop_ 
 _atom_site_label 
 _atom_site_type_symbol 
 _atom_site_fract_x 
 _atom_site_fract_y 
 _atom_site_fract_z 
 _atom_site_U_iso_or_equiv 
 _atom_site_adp_type 
 _atom_site_occupancy 
 _atom_site_calc_flag 
 _atom_site_refinement_flags 
 _atom_site_disorder_assembly 
 _atom_site_disorder_group 
Si1 Si 0.0000 0.5000 0.5000 0.01964(17) Uani 1 d S . . 
H1 H 0.149(3) 0.493(2) 0.600(2) 0.016(4) Uiso 1 d . . . 
Cl1 Cl 0.09204(7) 0.80029(6) 0.30441(5) 0.02906(15) Uani 1 d . . . 
N1 N 0.2510(2) 0.36961(19) 0.37458(16) 0.0206(3) Uani 1 d . . . 
C2 C 0.2207(3) 0.3576(2) 0.2285(2) 0.0230(3) Uani 1 d . . . 
H2A H 0.0780 0.4147 0.1881 0.028 Uiso 1 calc R . . 
C3 C 0.3867(3) 0.2664(2) 0.1339(2) 0.0231(3) Uani 1 d . . . 
C3' C 0.3384(3) 0.2580(3) -0.0274(2) 0.0303(4) Uani 1 d . . . 
H3'A H 0.2110 0.1815 0.0028 0.045 Uiso 1 calc R . . 
H3'B H 0.4762 0.1958 -0.0815 0.045 Uiso 1 calc R . . 
H3'C H 0.2965 0.3911 -0.1085 0.045 Uiso 1 calc R . . 
C4 C 0.5945(3) 0.1842(2) 0.1964(2) 0.0259(4) Uani 1 d . . . 
H4A H 0.7138 0.1205 0.1360 0.031 Uiso 1 calc R . . 
C5 C 0.6264(3) 0.1956(2) 0.3470(2) 0.0259(4) Uani 1 d . . . 
H5A H 0.7673 0.1395 0.3904 0.031 Uiso 1 calc R . . 
C6 C 0.4522(3) 0.2888(2) 0.4333(2) 0.0230(3) Uani 1 d . . . 
H6A H 0.4746 0.2962 0.5365 0.028 Uiso 1 calc R . . 
  
loop_ 
 _atom_site_aniso_label 
 _atom_site_aniso_U_11 
 _atom_site_aniso_U_22 
 _atom_site_aniso_U_33 
 _atom_site_aniso_U_23 
 _atom_site_aniso_U_13 
 _atom_site_aniso_U_12 
Si1 0.0156(3) 0.0219(3) 0.0215(3) -0.0102(2) -0.0024(2) 0.0009(2) 
Cl1 0.0258(2) 0.0229(2) 0.0315(2) -0.00764(17) 0.00134(16) -0.00063(16) 
N1 0.0180(7) 0.0195(6) 0.0228(6) -0.0081(5) -0.0023(5) -0.0005(5) 
C2 0.0198(8) 0.0237(8) 0.0240(8) -0.0089(6) -0.0038(6) 0.0007(6) 
C3 0.0245(8) 0.0186(8) 0.0234(8) -0.0072(6) 0.0001(6) -0.0027(6) 
C3' 0.0316(9) 0.0314(9) 0.0285(9) -0.0156(7) -0.0028(7) 0.0015(7) 
C4 0.0220(8) 0.0215(8) 0.0325(9) -0.0130(7) 0.0010(7) 0.0004(6) 
C5 0.0179(8) 0.0228(8) 0.0358(9) -0.0111(7) -0.0059(7) 0.0017(6) 
C6 0.0207(8) 0.0219(8) 0.0266(8) -0.0094(6) -0.0047(6) -0.0015(6) 
  
_geom_special_details 
; 
 All esds (except the esd in the dihedral angle between two l.s. planes) 
 are estimated using the full covariance matrix.  The cell esds are taken 
 into account individually in the estimation of esds in distances, angles 
 and torsion angles; correlations between esds in cell parameters are only 
 used when they are defined by crystal symmetry.  An approximate (isotropic) 
 treatment of cell esds is used for estimating esds involving l.s. planes. 
; 
  
loop_ 
 _geom_bond_atom_site_label_1 
 _geom_bond_atom_site_label_2 
 _geom_bond_distance 
 _geom_bond_site_symmetry_2 
 _geom_bond_publ_flag 
Si1 N1 1.9745(12) 2_566 ? 
Si1 N1 1.9745(12) . ? 
Si1 Cl1 2.2922(4) . ? 
Si1 Cl1 2.2922(4) 2_566 ? 
N1 C6 1.3453(19) . ? 
N1 C2 1.347(2) . ? 
C2 C3 1.387(2) . ? 
C3 C4 1.395(2) . ? 
C3 C3' 1.505(2) . ? 
C4 C5 1.387(2) . ? 
C5 C6 1.378(2) . ? 
  
loop_ 
 _geom_angle_atom_site_label_1 
 _geom_angle_atom_site_label_2 
 _geom_angle_atom_site_label_3 
 _geom_angle 
 _geom_angle_site_symmetry_1 
 _geom_angle_site_symmetry_3 
 _geom_angle_publ_flag 
N1 Si1 N1 180.0 2_566 . ? 
N1 Si1 Cl1 89.73(4) 2_566 . ? 
N1 Si1 Cl1 90.27(4) . . ? 
N1 Si1 Cl1 90.27(4) 2_566 2_566 ? 
N1 Si1 Cl1 89.73(4) . 2_566 ? 
Cl1 Si1 Cl1 180.0 . 2_566 ? 
C6 N1 C2 118.79(13) . . ? 
C6 N1 Si1 121.40(10) . . ? 
C2 N1 Si1 119.81(10) . . ? 
N1 C2 C3 123.52(14) . . ? 
C2 C3 C4 116.85(14) . . ? 
C2 C3 C3' 120.21(14) . . ? 
C4 C3 C3' 122.94(14) . . ? 
C5 C4 C3 119.87(14) . . ? 
C6 C5 C4 119.54(15) . . ? 
N1 C6 C5 121.42(14) . . ? 
  
loop_ 
 _geom_torsion_atom_site_label_1 
 _geom_torsion_atom_site_label_2 
 _geom_torsion_atom_site_label_3 
 _geom_torsion_atom_site_label_4 
 _geom_torsion 
 _geom_torsion_site_symmetry_1 
 _geom_torsion_site_symmetry_2 
 _geom_torsion_site_symmetry_3 
 _geom_torsion_site_symmetry_4 
 _geom_torsion_publ_flag 
N1 Si1 N1 C6 -101(20) 2_566 . . . ? 
Cl1 Si1 N1 C6 102.34(12) . . . . ? 
Cl1 Si1 N1 C6 -77.66(12) 2_566 . . . ? 
N1 Si1 N1 C2 78(20) 2_566 . . . ? 
Cl1 Si1 N1 C2 -78.77(12) . . . . ? 
Cl1 Si1 N1 C2 101.23(12) 2_566 . . . ? 
C6 N1 C2 C3 -0.2(2) . . . . ? 
Si1 N1 C2 C3 -179.10(12) . . . . ? 
N1 C2 C3 C4 -0.1(2) . . . . ? 
N1 C2 C3 C3' 179.50(15) . . . . ? 
C2 C3 C4 C5 0.2(2) . . . . ? 
C3' C3 C4 C5 -179.31(16) . . . . ? 
C3 C4 C5 C6 -0.2(2) . . . . ? 
C2 N1 C6 C5 0.3(2) . . . . ? 
Si1 N1 C6 C5 179.15(12) . . . . ? 
C4 C5 C6 N1 -0.1(2) . . . . ? 
  
_diffrn_measured_fraction_theta_max    0.974 
_diffrn_reflns_theta_full              26.37 
_diffrn_measured_fraction_theta_full   0.974 
_refine_diff_density_max    0.263 
_refine_diff_density_min   -0.259 
_refine_diff_density_rms    0.049 
